# Supplementary material for: Optimization of culturing conditions for isolated Arthrobacter sp. ZXY-2, an effective atrazine-degrading and salt-adaptive bacterium
Source: Royal Society of Chemistry journal article supplement (doi:10.1039/c7ra04661h), 2017-01-01
Supplement: c7ra04661h1.pdf [file c7ra04661h1.pdf]

## Supplementary material

### **Optimization of cultural conditions for isolated *Arthrobacter* sp. ZXY-2, an effective atrazine-degrading and salt-adaptive bacterium**

Xinyue Zhao<sup>1,2</sup>, Li Wang<sup>1</sup>, Linna Du<sup>3</sup>, Jixian Yang<sup>1</sup>, Jing Dong<sup>1</sup>, Fang Ma<sup>1,\*</sup>

(1. State Key Laboratory of Urban Water Resource and Environment, Harbin Institute of

Technology, Harbin 150090, China;

2. Section of Sanitary Engineering, Department of Water Management, Delft University of

Technology, Delft, 2628CN, the Netherlands;

3. Department of Agriculture and Biotechnology, Wenzhou Vocational College of Science and

Technology, Wenzhou 325006, China)

\*Corresponding author at: State Key Laboratory of Urban Water Resource and Environment, School of Municipal and Environmental Engineering, Harbin Institute of Technology, Harbin 150090, China.

Corresponding author email address: [mafang@hit.edu.cn](mailto:mafang@hit.edu.cn) ; Telephone/fax number: 86-045186283008

First author email address: [X.Zhao-3@tudelft.nl](mailto:X.Zhao-3@tudelft.nl)



---

|    |    |    |    |    |    |    |    |    |    |    |    |    |    |    |    |       |
|----|----|----|----|----|----|----|----|----|----|----|----|----|----|----|----|-------|
| 41 | +1 | +1 | +1 | +1 | -1 | -1 | -1 | -1 | +1 | -1 | -1 | -1 | -1 | +1 | +1 | 51.69 |
| 42 | -1 | +1 | -1 | -1 | -1 | +1 | +1 | -1 | +1 | +1 | -1 | -1 | +1 | -1 | -1 | 32.54 |
| 43 | 0  | 0  | 0  | 0  | 0  | 0  | 0  | 0  | 0  | 0  | 0  | 0  | 0  | 0  | 0  | 51.54 |
| 44 | +1 | +1 | -1 | +1 | +1 | -1 | -1 | +1 | -1 | -1 | +1 | +1 | +1 | -1 | +1 | 81.24 |
| 45 | +1 | -1 | +1 | -1 | +1 | -1 | -1 | -1 | +1 | +1 | -1 | +1 | +1 | -1 | -1 | 39.16 |
| 46 | 0  | 0  | 0  | 0  | 0  | 0  | 0  | 0  | 0  | 0  | 0  | 0  | 0  | 0  | 0  | 51.94 |
| 47 | -1 | +1 | -1 | -1 | +1 | +1 | +1 | +1 | -1 | +1 | +1 | +1 | +1 | +1 | -1 | 57.22 |
| 48 | +1 | -1 | +1 | +1 | +1 | +1 | +1 | -1 | -1 | -1 | -1 | +1 | -1 | -1 | -1 | 98.31 |
| 49 | -1 | +1 | +1 | +1 | +1 | -1 | +1 | +1 | +1 | +1 | +1 | -1 | -1 | -1 | -1 | 55.18 |
| 50 | 0  | 0  | 0  | 0  | 0  | 0  | 0  | 0  | 0  | 0  | 0  | 0  | 0  | 0  | 0  | 51.61 |
| 51 | -1 | -1 | -1 | -1 | +1 | -1 | -1 | -1 | -1 | +1 | +1 | -1 | +1 | -1 | +1 | 10.09 |
| 52 | -1 | +1 | -1 | +1 | -1 | -1 | +1 | +1 | +1 | +1 | -1 | +1 | +1 | +1 | +1 | 66.43 |
| 53 | 0  | 0  | 0  | 0  | 0  | 0  | 0  | 0  | 0  | 0  | 0  | 0  | 0  | 0  | 0  | 51.63 |
| 54 | -1 | +1 | +1 | -1 | -1 | +1 | -1 | -1 | +1 | +1 | +1 | -1 | +1 | -1 | +1 | 26.81 |

---

**Table S2** Observed and predicted values of atrazine degradation for the central composite design matrix of six variables.

| Run No. | Temperature       | pH                | Inoculum              | Sucrose           | Na <sub>2</sub> HPO <sub>4</sub> ·12H <sub>2</sub> O | atrazine                       | Atrazine degradation (%) |           |
|---------|-------------------|-------------------|-----------------------|-------------------|------------------------------------------------------|--------------------------------|--------------------------|-----------|
|         | (X <sub>1</sub> ) | (X <sub>2</sub> ) | size(X <sub>3</sub> ) | (X <sub>4</sub> ) | (X <sub>5</sub> )                                    | concentration(X <sub>6</sub> ) | Observed                 | Predicted |
| 1       | 40(+1)            | 7(-1)             | 10(+1)                | 3(+1)             | 12(+1)                                               | 50(-1)                         | 62.25                    | 61.88     |
| 2       | 30(-1)            | 7(-1)             | 5(-1)                 | 1(-1)             | 12(+1)                                               | 100(+1)                        | 19.62                    | 21.55     |
| 3       | 40(+1)            | 9(+1)             | 5(-1)                 | 3(+1)             | 12(+1)                                               | 50(-1)                         | 62.15                    | 64.28     |
| 4       | 30(-1)            | 7(-1)             | 5(-1)                 | 3(+1)             | 12(+1)                                               | 50(-1)                         | 63.33                    | 64.24     |
| 5       | 40(+1)            | 7(-1)             | 10(+1)                | 1(-1)             | 12(+1)                                               | 100(+1)                        | 51.98                    | 52.26     |
| 6       | 30(-1)            | 7(-1)             | 5(-1)                 | 1(-1)             | 6(-1)                                                | 50(-1)                         | 51.03                    | 50.63     |
| 7       | 40(+1)            | 9(+1)             | 10(+1)                | 3(+1)             | 6(-1)                                                | 50(-1)                         | 69.82                    | 67.87     |
| 8       | 30(-1)            | 9(+1)             | 5(-1)                 | 3(+1)             | 6(-1)                                                | 50(-1)                         | 63.94                    | 63.65     |
| 9       | 40(+1)            | 7(-1)             | 5(-1)                 | 1(-1)             | 6(-1)                                                | 100(+1)                        | 24.56                    | 25.51     |
| 10      | 30(-1)            | 7(-1)             | 10(+1)                | 1(-1)             | 6(-1)                                                | 100(+1)                        | 50.78                    | 48.64     |
| 11      | 30(-1)            | 9(+1)             | 5(-1)                 | 1(-1)             | 12(+1)                                               | 50(-1)                         | 59.89                    | 58.04     |
| 12      | 40(+1)            | 9(+1)             | 10(+1)                | 3(+1)             | 12(+1)                                               | 100(+1)                        | 59.05                    | 59.43     |
| 13      | 30(-1)            | 9(+1)             | 10(+1)                | 1(-1)             | 6(-1)                                                | 50(-1)                         | 66.34                    | 68.30     |
| 14      | 35(0)             | 8(0)              | 7.5(0)                | 2(0)              | 9(0)                                                 | 75(0)                          | 47.21                    | 49.22     |
| 15      | 30(-1)            | 7(-1)             | 5(-1)                 | 3(+1)             | 6(-1)                                                | 100(+1)                        | 27.73                    | 26.54     |
| 16      | 30(-1)            | 7(-1)             | 10(+1)                | 3(+1)             | 12(+1)                                               | 100(+1)                        | 56.85                    | 56.77     |
| 17      | 40(+1)            | 9(+1)             | 10(+1)                | 1(-1)             | 12(+1)                                               | 50(-1)                         | 65.07                    | 66.25     |
| 18      | 40(+1)            | 7(-1)             | 5(-1)                 | 3(+1)             | 6(-1)                                                | 50(-1)                         | 53.11                    | 54.12     |
| 19      | 30(-1)            | 7(-1)             | 10(+1)                | 3(+1)             | 6(-1)                                                | 50(-1)                         | 65.01                    | 64.69     |
| 20      | 35(0)             | 8(0)              | 7.5(0)                | 2(0)              | 9(0)                                                 | 75(0)                          | 49.88                    | 49.22     |
| 21      | 40(+1)            | 7(-1)             | 10(+1)                | 1(-1)             | 6(-1)                                                | 50(-1)                         | 63.13                    | 61.96     |
| 22      | 35(0)             | 8(0)              | 7.5(0)                | 2(0)              | 9(0)                                                 | 75(0)                          | 47.79                    | 49.22     |
| 23      | 40(+1)            | 9(+1)             | 10(+1)                | 1(-1)             | 6(-1)                                                | 100(+1)                        | 62.69                    | 61.77     |
| 24      | 40(+1)            | 9(+1)             | 5(-1)                 | 3(+1)             | 6(-1)                                                | 100(+1)                        | 41.35                    | 39.59     |
| 25      | 40(+1)            | 7(-1)             | 5(-1)                 | 3(+1)             | 12(+1)                                               | 100(+1)                        | 34.81                    | 32.84     |
| 26      | 35(0)             | 8(0)              | 7.5(0)                | 2(0)              | 9(0)                                                 | 75(0)                          | 51.01                    | 49.22     |
| 27      | 40(+1)            | 9(+1)             | 5(-1)                 | 1(-1)             | 12(+1)                                               | 100(+1)                        | 31.23                    | 31.53     |
| 28      | 30(-1)            | 9(+1)             | 10(+1)                | 3(+1)             | 12(+1)                                               | 50(-1)                         | 73.21                    | 72.25     |
| 29      | 30(-1)            | 9(+1)             | 10(+1)                | 1(-1)             | 12(+1)                                               | 100(+1)                        | 53.09                    | 52.07     |
| 30      | 35(0)             | 8(0)              | 7.5(0)                | 2(0)              | 9(0)                                                 | 75(0)                          | 51.05                    | 49.22     |
| 31      | 30(-1)            | 9(+1)             | 5(-1)                 | 1(-1)             | 6(-1)                                                | 100(+1)                        | 24.11                    | 24.47     |
| 32      | 40(+1)            | 9(+1)             | 5(-1)                 | 1(-1)             | 6(-1)                                                | 50(-1)                         | 61.07                    | 61.13     |
| 33      | 35(0)             | 8(0)              | 7.5(0)                | 2(0)              | 9(0)                                                 | 75(0)                          | 49.15                    | 49.22     |
| 34      | 30(-1)            | 9(+1)             | 10(+1)                | 3(+1)             | 6(-1)                                                | 100(+1)                        | 62.33                    | 64.48     |
| 35      | 35(0)             | 8(0)              | 7.5(0)                | 2(0)              | 9(0)                                                 | 75(0)                          | 50.31                    | 49.22     |
| 36      | 30(-1)            | 9(+1)             | 5(-1)                 | 3(+1)             | 12(+1)                                               | 100(+1)                        | 34.66                    | 35.82     |
| 37      | 40(+1)            | 7(-1)             | 5(-1)                 | 1(-1)             | 12(+1)                                               | 50(-1)                         | 62.09                    | 59.93     |
| 38      | 40(+1)            | 7(-1)             | 10(+1)                | 3(+1)             | 6(-1)                                                | 100(+1)                        | 51.43                    | 53.27     |
| 39      | 30(-1)            | 7(-1)             | 10(+1)                | 1(-1)             | 12(+1)                                               | 50(-1)                         | 64.39                    | 66.14     |

|    |        |       |        |       |        |         |       |       |
|----|--------|-------|--------|-------|--------|---------|-------|-------|
| 40 | 35(0)  | 8(0)  | 7.5(0) | 2(0)  | 9(0)   | 75(0)   | 47.19 | 49.22 |
| 41 | 35(0)  | 8(0)  | 7.5(0) | 2(0)  | 6(-1)  | 75(0)   | 46.61 | 48.42 |
| 42 | 30(-1) | 8(0)  | 7.5(0) | 2(0)  | 9(0)   | 75(0)   | 45.96 | 43.97 |
| 43 | 35(0)  | 8(0)  | 7.5(0) | 1(-1) | 9(0)   | 75(0)   | 42.02 | 42.90 |
| 44 | 35(0)  | 8(0)  | 5(-1)  | 2(0)  | 9(0)   | 75(0)   | 41.14 | 41.94 |
| 45 | 35(0)  | 8(0)  | 7.5(0) | 2(0)  | 12(+1) | 75(0)   | 51.21 | 49.59 |
| 46 | 35(0)  | 8(0)  | 10(+1) | 2(0)  | 9(0)   | 75(0)   | 59.06 | 58.45 |
| 47 | 35(0)  | 8(0)  | 7.5(0) | 2(0)  | 9(0)   | 100(+1) | 41.91 | 41.64 |
| 48 | 35(0)  | 9(+1) | 7.5(0) | 2(0)  | 9(0)   | 75(0)   | 52.98 | 52.05 |
| 49 | 35(0)  | 8(0)  | 7.5(0) | 2(0)  | 9(0)   | 50(0)   | 61.11 | 61.57 |
| 50 | 40(+1) | 8(0)  | 7.5(0) | 2(0)  | 9(0)   | 75(0)   | 42.76 | 44.93 |
| 51 | 35(0)  | 8(0)  | 7.5(0) | 3(+1) | 9(0)   | 75(0)   | 48.06 | 47.37 |
| 52 | 35(0)  | 8(0)  | 7.5(0) | 2(0)  | 9(0)   | 75(0)   | 47.99 | 47.66 |
| 53 | 35(0)  | 8(0)  | 7.5(0) | 2(0)  | 9(0)   | 75(0)   | 48.45 | 47.66 |
| 54 | 35(0)  | 7(-1) | 7.5(0) | 2(0)  | 9(0)   | 75(0)   | 45.31 | 46.43 |

Note: factors' unit refers to those in Table 1.
